# Supplementary material
Source: HighWire-hosted journal article supplement (https://bmjopenrespres.bmj.com/content/2/1/e000069)
Supplement: inline-supplementary-material-1 [file inline-supplementary-material-1.pdf]

## Online supplement

### **Longitudinal change in quality of life following hospitalisation for acute exacerbations of COPD**

J. Steer<sup>1</sup>, G.J.Gibson<sup>2</sup>, S.C.Bourke<sup>1,2</sup>

1) Department of Respiratory Medicine, North Tyneside General Hospital, Rake Lane, North Shields, UK; 2) Newcastle University, Framlington Place, Newcastle-upon-Tyne, UK

#### **Authors' details**

Dr. John Steer: Consultant Respiratory Physician. PhD

Professor John Gibson: Emeritus Professor of Respiratory Medicine. MD

Dr. Stephen Bourke: Consultant Respiratory Physician. PhD

#### **Address for correspondence:**

Dr John Steer,  
North Tyneside General Hospital,  
Northumbria Health NHS Foundation Trust,  
Rake Lane, North Shields,  
Tyne and Wear, NE29 8NH,  
United Kingdom.  
Tel: +44-8448118111 ext 2819  
Fax: +44-1912934026  
E-mail: john.steer@nhct.nhs.uk

Figure E1 Graph illustrating calculation and clinical implication of mean change in quality of life during follow-up period\*

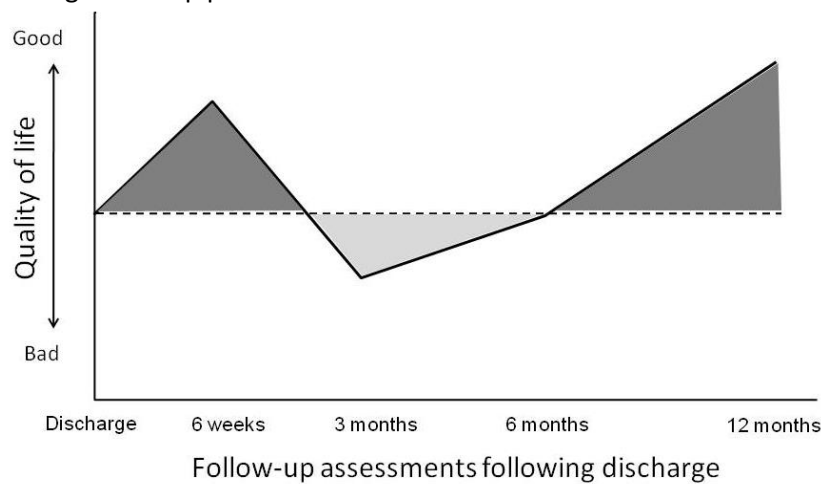

\* Mean change in quality of life ( $\bar{\Delta}$ ) = [area above the patient's baseline value (dark grey shading)] – [area below the patient's baseline value (light grey shading)] divided by length of follow-up.

Figure E2. Flowchart detailing attendance for longitudinal assessments of quality of life and health resource use following hospital discharge

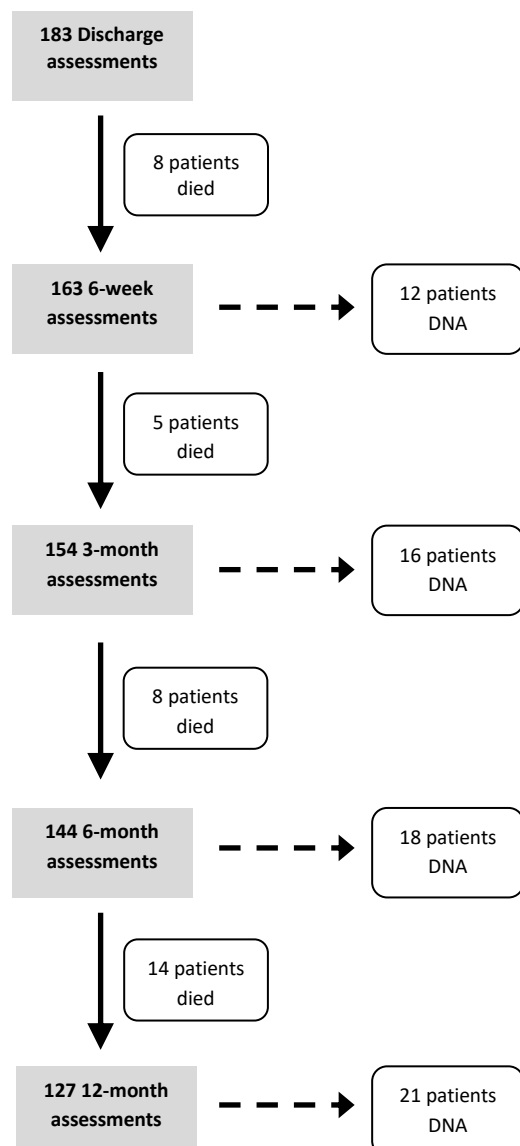

Table E1. QoL at discharge and mortality within 12 months

| Quality of life measurement    | Died, n =33       | Survived, n = 150 | p value* |
|--------------------------------|-------------------|-------------------|----------|
| SGRQ Symptoms, mean (SD)†      | 63.3 (20.8)       | 66.7 (19.7)       | 0.38     |
| SGRQ Activity, mean (SD)†      | 85.0 (12.8)       | 77.9 (16.3)       | 0.0209   |
| SGRQ Impacts, mean (SD)†       | 55.7 (19.1)       | 48.9 (19.8)       | 0.0714   |
| SGRQ Total, mean (SD)†         | 65.6 (15.2)       | 60.7 (17.1)       | 0.13     |
| CRQ Dyspnoea, median (IQR)‡    | 2.8 (1.7 to 4.1)  | 2.8 (2.15 to 3.8) | 0.56     |
| CRQ Emotional, median (IQR)‡   | 2.3 (1.5 to 3)    | 2.4 (1.5 to 3.3)  | 0.83     |
| CRQ Fatigue, median (IQR)‡     | 3.7 (2.65 to 4.4) | 3.4 (2.38 to 4.9) | 0.69     |
| CRQ Mastery, median (IQR)‡     | 3 (2.15 to 4.15)  | 3.3 (2.2 to 4.5)  | 0.60     |
| HADS anxiety, median (IQR)†    | 8 (5 to 12.5)     | 8 (4 to 14)       | 0.93     |
| HADS depression, median (IQR)† | 8 (5 to 10.5)     | 6 (3 to 9)        | 0.0825   |
| NEADL, median (IQR)‡           | 28 (14 to 37)     | 38 (28 to 45)     | <0.0001  |

†Lower values indicate improved quality of life; ‡Higher values indicate improved quality of life. SGRQ – St George's Respiratory Questionnaire; CRQ – Chronic Respiratory Disease Questionnaire; HADS – Hospital Anxiety and Depression Scale; NEADL – Nottingham Extended Activity of Daily Living Scale.

Table E2. QoL at discharge and readmission during follow-up

| Mean change in quality of life | Readmitted, n =130 | Not readmitted, n = 53 | p value* |
|--------------------------------|--------------------|------------------------|----------|
| SGRQ Symptoms, mean (SD)†      | 66.3 (19.5)        | 65.6 (20.8)            | 0.85     |
| SGRQ Activity, mean (SD)†      | 81.1 (14.8)        | 74.6 (17.8)            | 0.0119   |
| SGRQ Impacts, mean (SD)†       | 51.4 (20.5)        | 47.1 (17.6)            | 0.19     |
| SGRQ Total, mean (SD)†         | 62.6 (17.6)        | 59.1 (14.9)            | 0.21     |
| CRQ Dyspnoea, median (IQR)‡    | 2.8 (2 to 4)       | 2.8 (2 to 3.6)         | 0.46     |
| CRQ Emotional, median (IQR)‡   | 3.4 (2.4 to 4.9)   | 3.6 (2.4 to 4.8)       | 0.90     |
| CRQ Fatigue, median (IQR)‡     | 2.3 (1.5 to 3)     | 2 (1.3 to 3.2)         | 0.56     |
| CRQ Mastery, median (IQR)‡     | 3 (2.3 to 4.3)     | 3.3 (1.8 to 4.9)       | 0.92     |
| HADS anxiety, median (IQR)†    | 8 (4 to 14)        | 9 (4.5 to 13)          | 0.83     |
| HADS depression, median (IQR)† | 6 (3 to 10)        | 6 (3 to 8)             | 0.37     |
| NEADL, median (IQR)‡           | 34 (24 to 42)      | 42 (33 to 51)          | 0.0001   |

†Lower values indicate improved quality of life; ‡Higher values indicate improved quality of life. SGRQ – St George's Respiratory Questionnaire; CRQ – Chronic Respiratory Disease Questionnaire; HADS – Hospital Anxiety and Depression Scale; NEADL – Nottingham Extended Activity of Daily Living Scale.

Table E3 Mean change in QoL, HADS and functional status and hospital readmission

| <i>Mean change in quality of life</i> | <i>Readmitted, n = 126</i> | <i>Not readmitted, n = 50</i> | <i>p value</i> | <i>Frequent (&gt;2) AECOPD, n = 78</i> | <i>Infrequent (≤2) AECOPD, n = 98</i> | <i>p value</i> |
|---------------------------------------|----------------------------|-------------------------------|----------------|----------------------------------------|---------------------------------------|----------------|
| SGRQ Symptoms <sup>†</sup>            | -4.95 (17.6)               | -17.9 (21.2)                  | <0.001         | -7.82 (15.6)                           | -9.66 (23.6)                          | 0.55           |
| SGRQ Activity <sup>†</sup>            | 3.06 (8.70)                | -1.42 (17.6)                  | 0.091          | 2.48 (10.1)                            | 0.93 (14.1)                           | 0.40           |
| SGRQ Impacts <sup>†</sup>             | 0.75 (13.8)                | -12.2 (15.3)                  | <0.001         | -2.61 (12.5)                           | -3.42 (18.5)                          | 0.75           |
| SGRQ Total <sup>†</sup>               | 0.46 (11.4)                | -9.79 (14.1)                  | <0.001         | -1.90 (9.95)                           | -3.15 (16.1)                          | 0.55           |
| CRQ Dyspnoea <sup>‡</sup>             | -0.16 (1.20)               | 0.80 (1.37)                   | 0.003          | 0.20 (1.19)                            | 0.51 (1.38)                           | 0.43           |
| CRQ Emotional <sup>‡</sup>            | 0.25 (1.05)                | 0.86 (1.22)                   | 0.001          | 0.45 (0.99)                            | 0.39 (1.29)                           | 0.72           |
| CRQ Fatigue <sup>‡</sup>              | 0.20 (1.06)                | 0.84 (1.28)                   | 0.001          | 0.35 (1.09)                            | 0.43 (1.24)                           | 0.65           |
| CRQ Mastery <sup>‡</sup>              | 0.48 (1.19)                | 1.53 (1.38)                   | <0.001         | 0.69 (1.17)                            | 0.88 (1.52)                           | 0.38           |
| HADS anxiety <sup>†</sup>             | -1.16 (3.31)               | -2.39 (3.28)                  | 0.029          | -1.42 (3.27)                           | -1.66 (3.45)                          | 0.65           |
| HADS depression <sup>†</sup>          | -0.34 (2.94)               | -0.68 (2.99)                  | 0.50           | -0.59 (3.06)                           | -0.23 (2.79)                          | 0.43           |
| NEADL <sup>‡</sup>                    | -4.39 (7.73)               | -1.05 (8.17)                  | 0.012          | -3.45 (7.49)                           | -3.43 (8.60)                          | 0.98           |

Values shown as mean (SD). <sup>†</sup>Lower values indicate improved quality of life; <sup>‡</sup>Higher values indicate improved quality of life. SGRQ – St George's Respiratory Questionnaire; CRQ – Chronic Respiratory Disease Questionnaire; HADS – Hospital Anxiety and Depression Scale; NEADL – Nottingham Extended Activity of Daily Living Scale.
